# Supplementary material
Source: PubMed Central journal article supplement (PMC1142366)
Supplement: pnas_0500760102_2.pdf [file pnas_0500760102_2.pdf]

| Species           | Accession | Score        | Sequence                                                             |
|-------------------|-----------|--------------|----------------------------------------------------------------------|
| Mouse             | XP_283418 | <u>score</u> | MVKLLPAQEA AKIYHTNYVRNSRAVGV MWGTLTICFSVLVMA LFIQPYWIGDSVSTPQAGYFGL  |
| Rat               | AAH87673  | 100          | MVKLLPAQEA AKIYHTNYVRNSRAVGV MWGTLTICFSVLVMA LFIQPYWIGDSVSTPQAGYFGL  |
| Human             | AAH28630  | 98           | MVKLLPAQEA AKIYHTNYVRNSRAVGV MWGTLTICFSVLVMA LFIQPYWIGDSVNTPQAGYFGL  |
| Chicken           | AAP21810  | 75           | MPKLLPAQEA ARIYHTNYVRNARAMGVLWALFTLCFSILMVVTFIQPYWIGDSIDTPQAGYFGL    |
| Pufferfish        | CAF96119  | 69           | ---MIPAKEAAKIYHTNYVRNARAVGVLWTVFTITFAVITVVVFIQPYWIGDSVSTPQAGYFGL     |
| <i>Drosophila</i> | AAF47590  | 30           | MGTKIEYVD TTHLYASKYIRNSKAI GVLWAI FTICYAIIGIVAFVTP EWIGD-PDNDGAGRLGL |
| <i>C. elegans</i> | CAB02318  | 27           | -----MQQFSLSYHSIYTRNWRVVGAIWVLCGLCTTVLQTLALIHPTWIGS----DEGGYFGL      |

|                   |                                                                                        |
|-------------------|----------------------------------------------------------------------------------------|
| Mouse             | FSYCVGNVLSSELICKGGPLDFSSIPSRAFKTAMFFVALAMFLIIGSIIICFSLFFVCNTATVYKICAWMQLAAATGLMIGCLVY  |
| Rat               | FSYCVGNVLSSELICKGGPLDFSSIPSRAFKTAMFFVALAMFLIIGSIIICFSLFFVCNTATVYKICAWMQLAAATGLMIGCLVY  |
| Human             | FSYCVGNVLSSELICKGGPLDFSSIPSRAFKTAMFFVALGMFLIIGSIIICFSLFFICNTATVYKICAWMQLAAATGLMIGCLVY  |
| Chicken           | FSYCIGNALTGELICKGSPDFGTIPSSAFKTAMFFVGI STFLIIGSILCFSLFFF CNAATVYKVCAWMQLAAATGLMIGCLVY  |
| Pufferfish        | FHYCIGNALTSELTCKGSALDFGSIPSGAFKTAMFFVGISMLLVGSI VCFSLFFF CNAAGSVYKICAWMQLASSTCMVIGCMVY |
| <i>Drosophila</i> | WQQCQRDEIFDN--CRRRWESIFEVPTFSFQLATFFMLGAIALALLTIFFLVCLLFMKSTRVFHLCGWMQII SAICMIVACAAF  |
| <i>C. elegans</i> | YDYCGTS-----ECPWSPFRVRPLS-MWFEI SAFLVLAATVLSFLAIFSI LLLVLLRDRHAFILCSWLHFFAFVFM LAGCVLY |

C161F

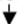

|                   |                                                                                   |
|-------------------|-----------------------------------------------------------------------------------|
| Mouse             | PDGWDSSEVRRMCGEQTGKYTLGHCTIRWAFMLAILSIGDALILSFLAFVLGYRQDKLLPDDYKADGNEEV----- 219  |
| Rat               | PDGWDSSEVRRMCGEQTGKYTLGHCTIRWAFMLAILSIGDALILSFLAFVLGYRQDKLLPDDYKADGNEEV----- 219  |
| Human             | PDGWDSSEVRRMCGEQTGKYTLGHCTIRWAFMLAILSIGDALILSFLAFVLGYRQDKLLPDDYKADGTEEV----- 219  |
| Chicken           | PDGWDSSEVKRMC GDKTDKYTLGACTVRWAYILCIIGILDALILSFLAFVLGNRQDNLLPSDFKVESKEEGNE--- 221 |
| Pufferfish        | PDGWDSDEVKRMCGQRTDKYTLGNCTVRWAYILAIISIMDSLVLVSLVAFSLGSRQDKLLPEDFQVE----- 211      |
| <i>Drosophila</i> | PFGWNSDDFRKICGPEANRFELGLCGIRWAYPLAIGCIDGVVLATLAFILATRHVRLQP---(first 205 of 265)  |
| <i>C. elegans</i> | PYGWENPRVREICE--SKKYQLGLCQIRWPYLLAMVLVFDQLCLCCLGFALALKKPKIP---(first 190 pf 229)  |
