# Supplementary material
Source: PubMed Central journal article supplement (PMC1142366)

**A**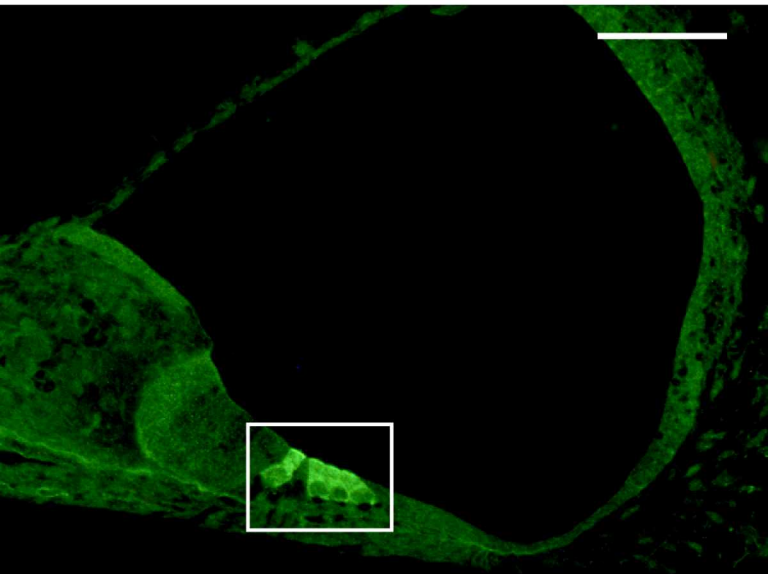**B**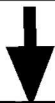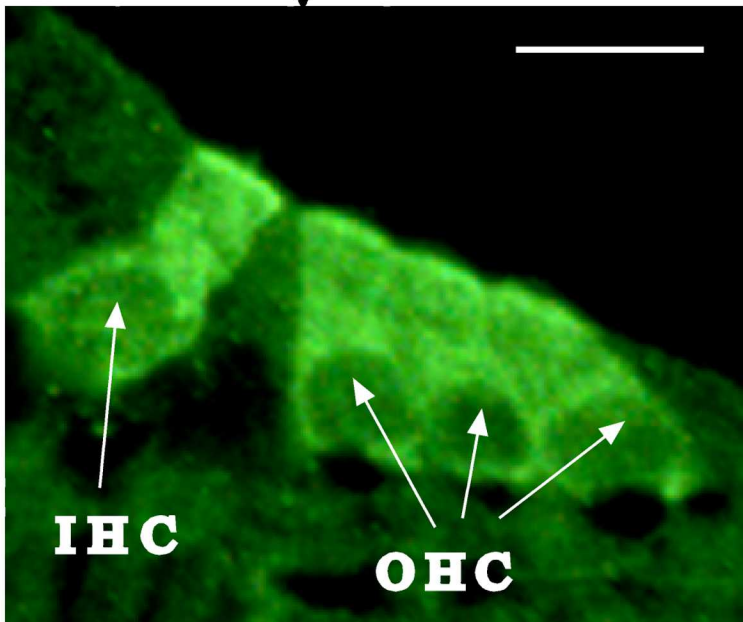

Supplement: pnas_0500760102_3.pdf [file pnas_0500760102_3.pdf]

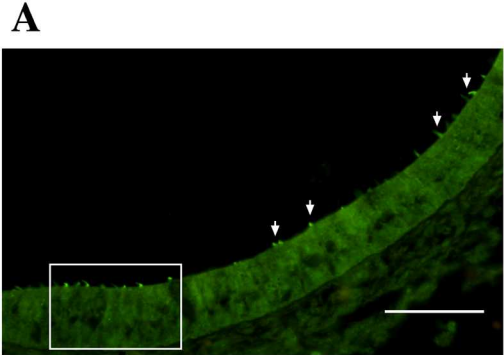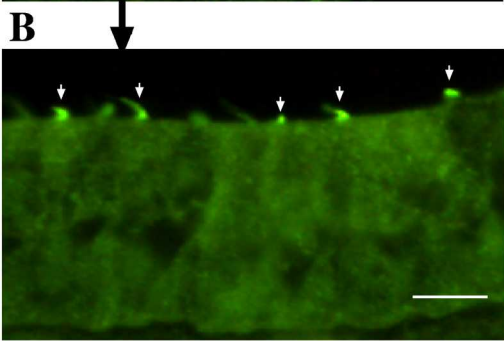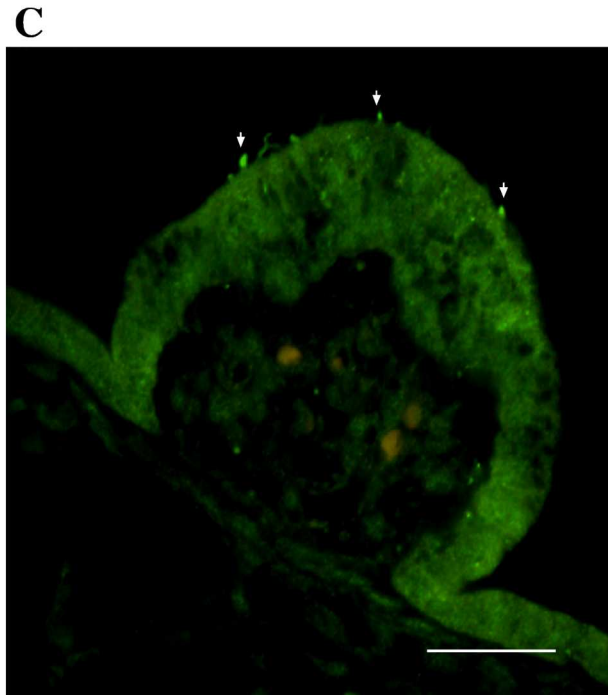

Supplement: pnas_0500760102_4.pdf [file pnas_0500760102_4.pdf]
